# Supplementary material
Source: PubMed Central journal article supplement (PMC2755882)
Supplement: supp_M109.012112_jbc.M109.012112-1.pdf [file supp_M109.012112_jbc.M109.012112-1.pdf]

# Supplementary Figure 1

**A**

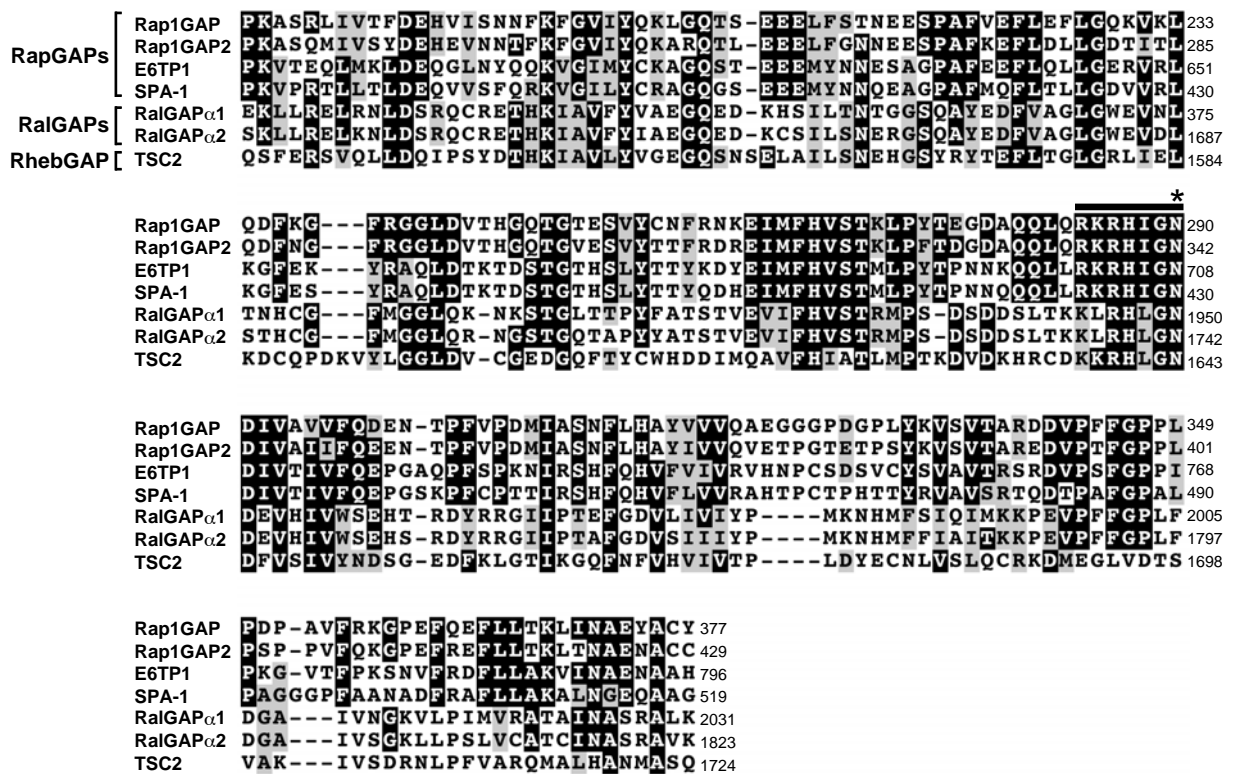

**B**

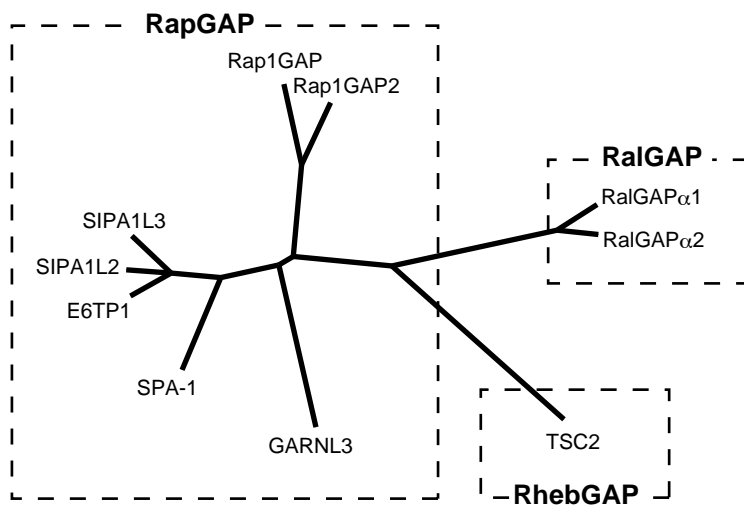

SUPPLEMENTARY FIGURE 1. **The asparagine thumb GAP family.** *A*, Amino acid sequence alignment of the catalytic domain of *H. sapiens* Rap1GAP (NP\_002876), Rap1GAP2 (NP\_001093868), SPA-1 (NP\_006738), E6TP1 (NP\_056371), TSC2 (NP\_000539), RalGAP $\alpha$ 1 (NP\_055805), and RalGAP $\alpha$ 2 (NP\_0655076). Black boxes and shaded boxes indicate >50% conserved and >50% similar residues, respectively. The black bar shows the catalytic helix of Rap1GAP. An asterisk marks the position of the catalytic asparagine. *B*, Phylogenetic tree of the asparagine thumb GAP family. Three putative RapGAPs, SIPA1L2 (NP\_065859), SIPA1L3 (NP\_055888), and GARNL3 (NP\_115669) are also included. The human asparagine thumb GAP family comprises 2 RalGAPs, 1 RhebGAP, and 7 probable RapGAPs.

# Supplementary Figure 2

**A**

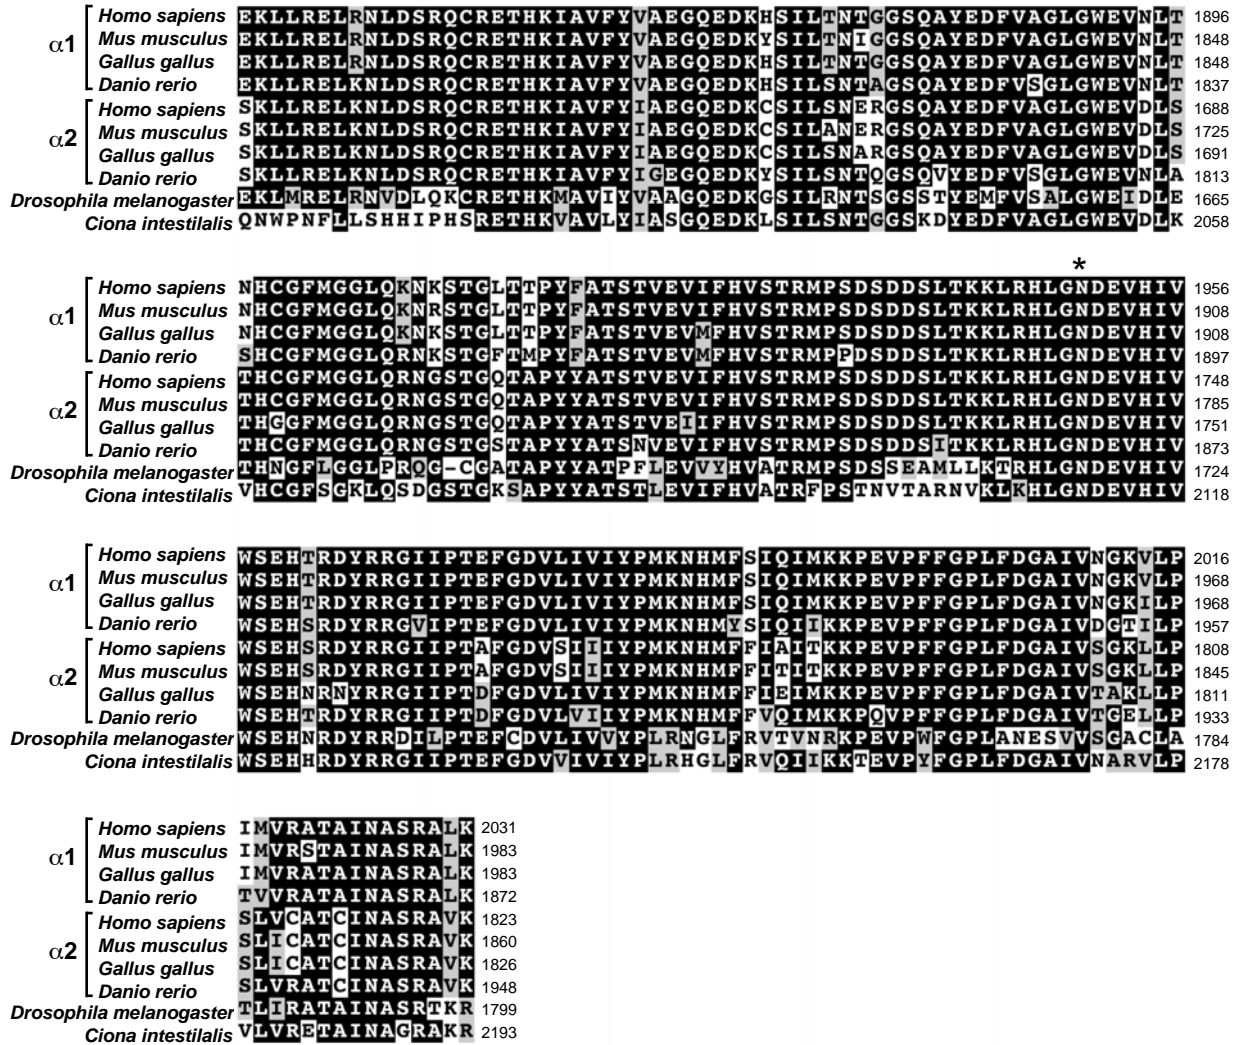

**B**

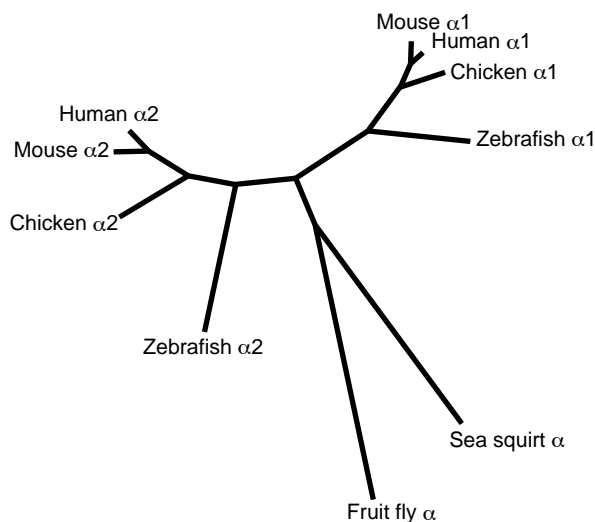

SUPPLEMENTARY FIGURE 2. **Comparison of RalGAP $\alpha$  homologues.** A, Amino acid sequence alignment of the catalytic domain of RalGAP $\alpha$  from various species: *H.sapiens*  $\alpha$ 1, *M.musculus*  $\alpha$ 1 (NP\_064378), *G.gallus*  $\alpha$ 1 (XP\_421244), *D.rerio*  $\alpha$ 1 (XP\_684334), *H.sapiens*  $\alpha$ 2, *M.musculus*  $\alpha$ 2 (NP\_001028520), *G.gallus*  $\alpha$ 2 (XP\_419313), *D.rerio*  $\alpha$ 2 (XP\_001920508), *D.melanogaster*  $\alpha$  (NP\_651516), and *C.intestinalis*  $\alpha$  (XP\_002123952). An asterisk marks the position of the asparagine corresponding to the catalytic asparagine of Rap1GAP. Invertebrates such as fruit fly and sea squirt possess a single gene for the  $\alpha$  subunit. B, Phylogenetic tree of RalGAP $\alpha$  homologues.
